# Supplementary material
Source: PubMed Central journal article supplement (PMC6648187)
Supplement: Supp_Fig1.pdf [file Supp_Fig1.pdf]

## Supplementary Data

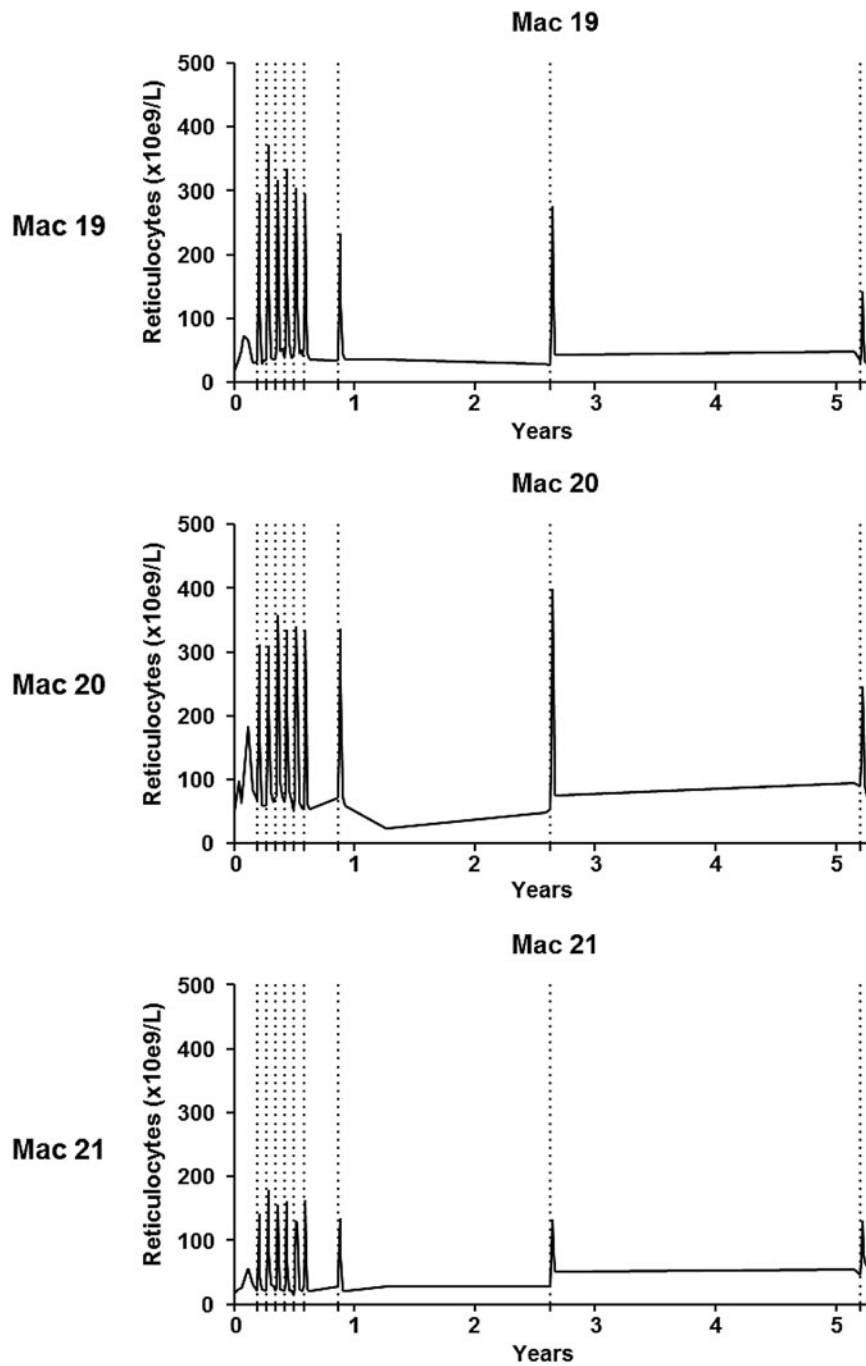

**Supplementary Figure S1.** Long-term induction of reticulocytes in the blood. Reticulocytes (red blood cells precursors) were measured throughout the duration of the protocol. Monitoring of blood parameters was performed by the technical core facility of the University Hospital of Nantes (CHU of Nantes). Doxycycline administration is indicated by *dotted lines*. Reticulocyte peaks are correlated with those of Epo.
